# Supplementary material
Source: MDPI journal article supplement (https://www.mdpi.com/2077-0472/10/11/568)
Supplement: s1 [file s1]

**Table S1.** The results of the Bivariate Probit Model using RAA variables only.

|                                     | Would join |              | Would create |              |
|-------------------------------------|------------|--------------|--------------|--------------|
|                                     | Coeff.     | z-statistics | Coeff.       | z-statistics |
| Attitude (A)                        | 0.060***   | 5.54         | 0.041***     | 4.29         |
| Social norms (SN)                   | 0.024**    | 2.18         | 0.024**      | 2.27         |
| Perceived behavioural control (PBC) | -0.005     | -0.33        | 0.000        | -0.01        |
| _cons                               | -1.752     | -6.82        | -1.361       | -6.03        |
| rho (q)                             | 0.599      | 5.70         |              |              |
| Number of observations              | 181        |              |              |              |
| Log-likelihood                      | -166.206   |              |              |              |

Note: \*\*, \*\*\* for 5 and 1% of significance level, respectively.

**Table S1.** The results of the Bivariate Probit Model using components derived from the PCA

|                             | Would join |              | Would create |              |
|-----------------------------|------------|--------------|--------------|--------------|
|                             | Coeff.     | z-statistics | Coeff.       | z-statistics |
| Dairy as a source of income | -0.090     | -1.10        | -0.119       | -1.38        |
| Capacity to produce         | 0.098      | 1.14         | 0.071        | 0.87         |
| Awareness and knowledge     | 0.135**    | 2.00         | 0.252***     | 3.58         |
| Own boss                    | 0.032      | 0.44         | 0.075        | 0.93         |
| Benefits collaboration      | 0.150      | 1.57         | 0.096        | 1.00         |
| Trust business              | -0.164*    | -1.78        | -0.109       | -1.17        |
| Trust close ones            | 0.239**    | 2.43         | -0.027       | -0.29        |
| SU nostalgic                | -0.094     | -1.13        | -0.021       | -0.25        |
| Risk                        | 0.375***   | 4.65         | 0.395***     | 4.84         |
| _cons                       | -0.581     | -5.12        | -0.595       | -5.22        |
| rho (q)                     | 0.673      | 7.19         |              |              |
| Number of observations      | 181        |              |              |              |
| Log-likelihood              | -164.612   |              |              |              |

Note: \*, \*\*, \*\*\* for 10, 5 and 1% of significance level, respectively

**Table S2.** The Bivariate Probit Model with only significant covariates

|                             | Coeff.   | z-statistics |
|-----------------------------|----------|--------------|
| <b>Would join</b>           |          |              |
| Attitude (A)                | 0.062*** | 0.01         |
| Social norms (SN)           | 0.009    | 0.01         |
| Dairy as a source of income | -0.156*  | 0.09         |
| Capacity to produce risk    | 0.114    | 0.08         |
|                             | 0.247*** | 0.09         |
| Gender (1. Male)            | 0.601*** | 0.22         |
| _cons                       | -2.176   | 0.32         |
| <b>Would create</b>         |          |              |
| Attitude (A)                | 0.039*** | 0.01         |
| Dairy as a source of income | -0.123*  | 0.07         |
| Awareness and knowledge     | 0.248*** | 0.07         |
| Risk                        | 0.263*** | 0.09         |
| Nationality (1. Kazakh)     | 0.655*** | 0.24         |
| Education (1. University)   | -0.422*  | 0.25         |
| _cons                       | -1.636   | 0.31         |
| rho (ρ)                     | 0.626    | 5.40         |
| Number of observations      | 181      |              |
| Log-likelihood              | -147.226 |              |

Note: \*, \*\*, \*\*\* for 10, 5 and 1% of significance level, respectively

Model 1 – The full model using all variables (i.e. RAA, PCA, socio-demographic and location)

Model 2 – Model using only RAA variables (i.e. A, SN, PBC)

Model 3 – Model using only components derived from PCA (i.e. PC1 - PC9)

Model 4 – Model using significant variables only

**Table S3.** Comparison of the results from different models

|                    | Likelihood-ratio test | Prob > chi2 |
|--------------------|-----------------------|-------------|
| Model 1 vs model 2 | LR chi2(32) = 59.10   | 0.0025      |
| Model 1 vs model3  | LR chi2(20) = 55.91   | 0.0000      |
| Model 1 vs model 4 | LR chi2(26) = 21.14   | 0.7348      |

**Table S4.** Correlation matrix for RAA variables and components (PCs) derived from the PCA

|                               | Attitude | Social norms | Perceived behavioural control | Dairy as a source of income | Capacity to produce | Awareness and knowledge | Own boss | Benefits collaboration | Trust business | Trust close ones | SU nostalgic | Risk |
|-------------------------------|----------|--------------|-------------------------------|-----------------------------|---------------------|-------------------------|----------|------------------------|----------------|------------------|--------------|------|
| Attitude                      | 1        |              |                               |                             |                     |                         |          |                        |                |                  |              |      |
| Social norms                  | 0.383    | 1            |                               |                             |                     |                         |          |                        |                |                  |              |      |
| Perceived behavioural control | 0.446    | 0.453        | 1                             |                             |                     |                         |          |                        |                |                  |              |      |
| Dairy as a source of income   | 0.184    | -0.071       | 0.162                         | 1                           |                     |                         |          |                        |                |                  |              |      |
| Capacity to produce           | 0.018    | -0.089       | 0.076                         | 0.520                       | 1                   |                         |          |                        |                |                  |              |      |
| Awareness and knowledge       | 0.269    | 0.160        | 0.202                         | 0.065                       | 0.062               | 1                       |          |                        |                |                  |              |      |
| Own boss                      | 0.218    | -0.053       | 0.066                         | 0.237                       | 0.213               | 0.042                   | 1        |                        |                |                  |              |      |
| Benefits collaboration        | 0.348    | 0.130        | 0.346                         | -0.030                      | -0.107              | 0.112                   | 0.109    | 1                      |                |                  |              |      |
| Trust business                | 0.209    | 0.116        | 0.140                         | 0.179                       | -0.024              | 0.237                   | 0.177    | 0.207                  | 1              |                  |              |      |
| Trust close ones              | 0.231    | 0.067        | 0.162                         | 0.068                       | -0.120              | 0.044                   | 0.090    | 0.237                  | 0.324          | 1                |              |      |
| SU nostalgic                  | -0.037   | -0.113       | -0.135                        | -0.096                      | -0.097              | -0.174                  | 0.179    | 0.099                  | -0.065         | 0.081            | 1            |      |
| Risk                          | 0.466    | 0.383        | 0.324                         | 0.185                       | 0.106               | 0.185                   | 0.145    | 0.120                  | 0.230          | 0.118            | -0.245       | 1    |
